# Supplementary material
Source: PubMed Central journal article supplement (PMC5423109)
Supplement: cdd201721x1.pdf [file cdd201721x1.pdf]

## Supplementary Figure S1

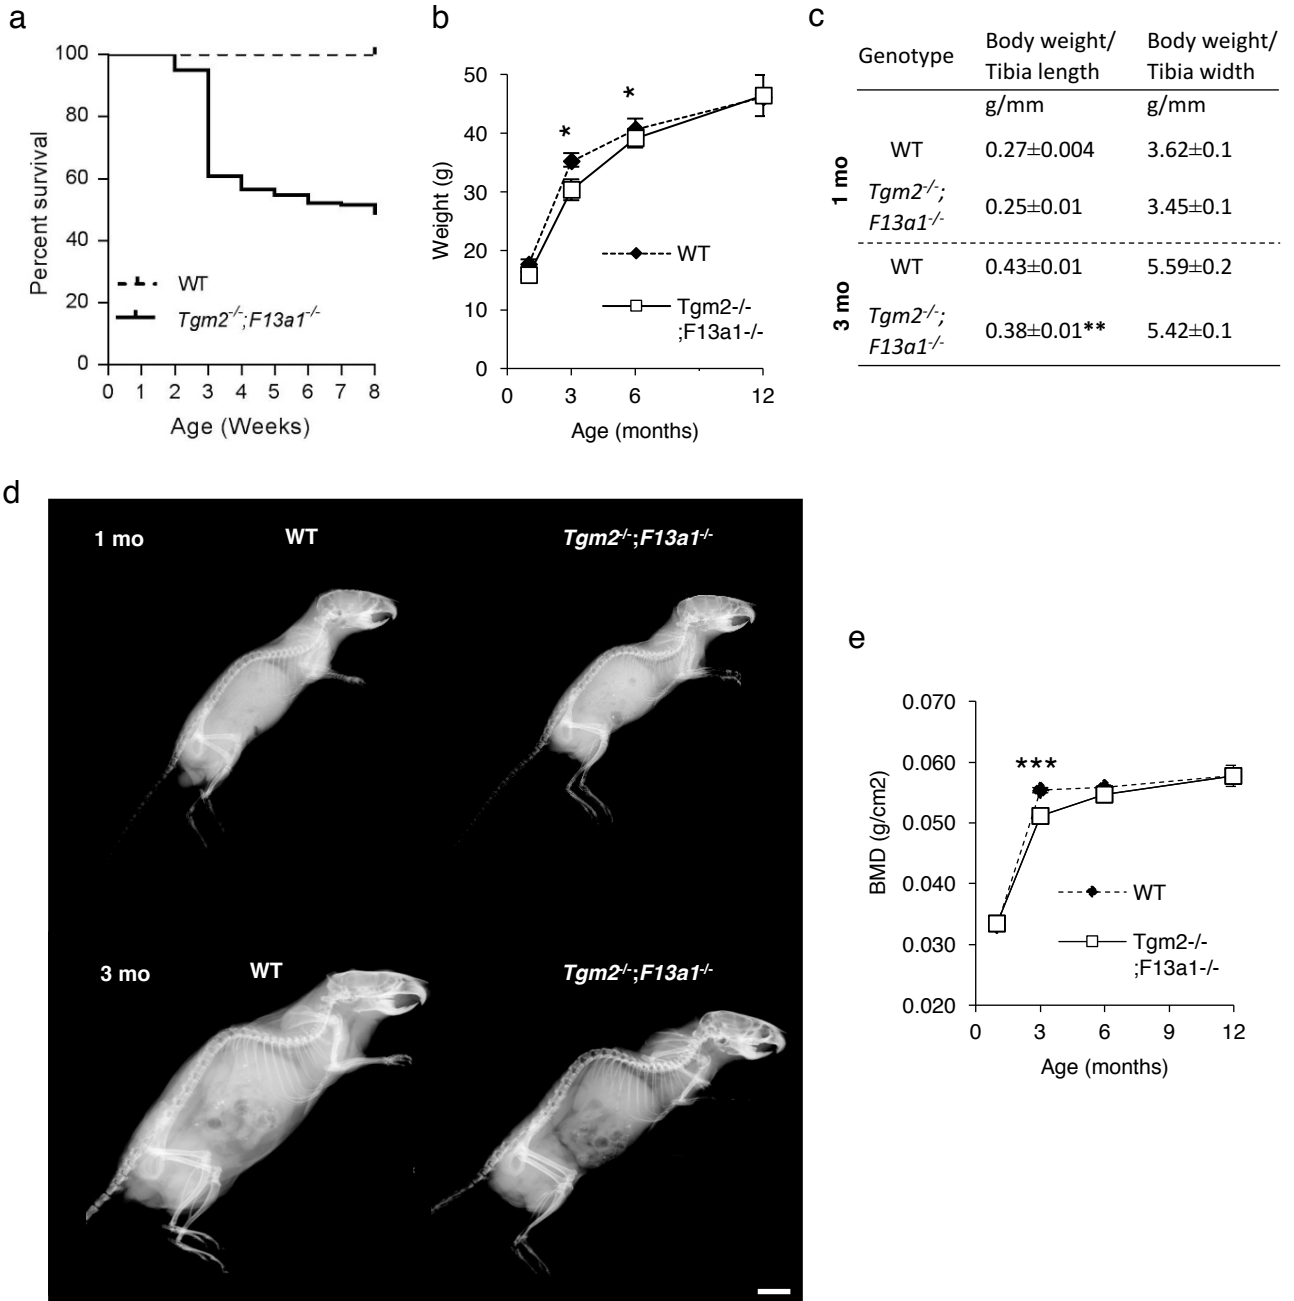

**Supplementary Figure S1. Survival and gross phenotype of *Tgm2<sup>-/-</sup>;**F13a1<sup>-/-</sup>* double-null mice.** (a) Kaplan-Meier survival curve showing increased lethality in *Tgm2<sup>-/-</sup>;**F13a1<sup>-/-</sup>* mice; 51.5% of male mice were lost by 4 weeks of age (161 male mice counted). (b) Body weight measurements of the surviving mice show that *Tgm2<sup>-/-</sup>;**F13a1<sup>-/-</sup>* are normal weight at 1 month mice but have lower body weight at 3 and 6 months which normalizes again 1 year age. n=6-14. (c-d) Measurements of tibia lengths and their normalization to body weight show that mice are smaller only at 3 months and not at 1 month. n=6. (d) X-ray images of representative WT and *Tgm2<sup>-/-</sup>;**F13a1<sup>-/-</sup>* mice at 1 month and 3 month age. *Tgm2<sup>-/-</sup>;**F13a1<sup>-/-</sup>* mouse appears normal size at 1 month and smaller at 3 month age. (e) Bone mineral density (BMD) measurements of WT and *Tgm2<sup>-/-</sup>;**F13a1<sup>-/-</sup>* mice up to 1 year age. Data shows that WT mice reach their adult BMD at 3 months, but that *Tgm2<sup>-/-</sup>;**F13a1<sup>-/-</sup>* mice do not. However, normal BMD is reached at 6 month age. n=6-15. \* $p < 0.05$ , \*\* $p < 0.01$ , \*\*\* $p < 0.001$ . Scale bar: 1 cm.

## Supplementary Figure S2

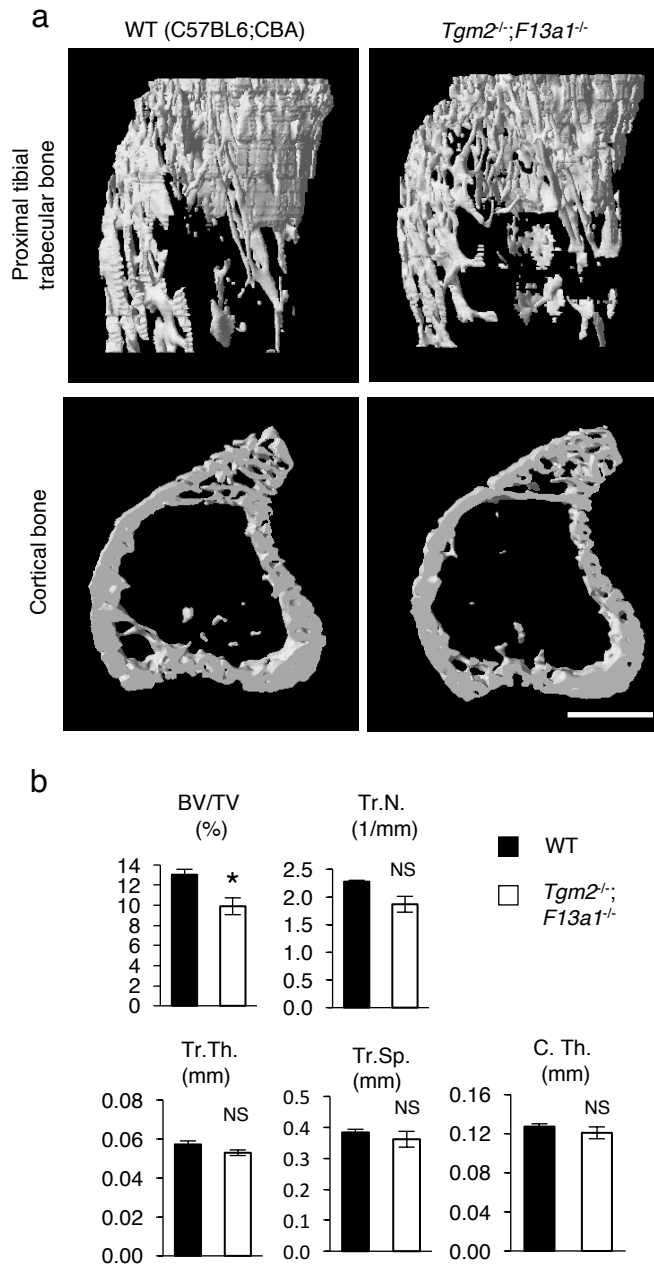

**Supplementary Figure 2. Micro-computed tomography ( $\mu$ CT) analyses of bone parameters of proximal tibial trabecular bone and cortical bone of 1 month old WT and *Tgm2<sup>-/-</sup>;F13a1<sup>-/-</sup>* mice. (a) No trabecular bone loss or cortical thinning was visible in 1 month old *Tgm2<sup>-/-</sup>;F13a1<sup>-/-</sup>* mice. (b) Quantified  $\mu$ CT parameters of bone shows only decreased mineralized bone volume over tissue volume (BV/TV). Other parameters: trabecular number (Tr.N.), trabecular thickness (Tr.Th.), trabecular spacing (Tr.Sp.) and cortical thickness (C.Th) show no significant difference between WT and in *Tgm2<sup>-/-</sup>;F13a1<sup>-/-</sup>* mice. n=4 for each group. \* $p < 0.05$ , NS; not significant. Scale bar: 500  $\mu$ m (a)**

## Supplementary Figure S3

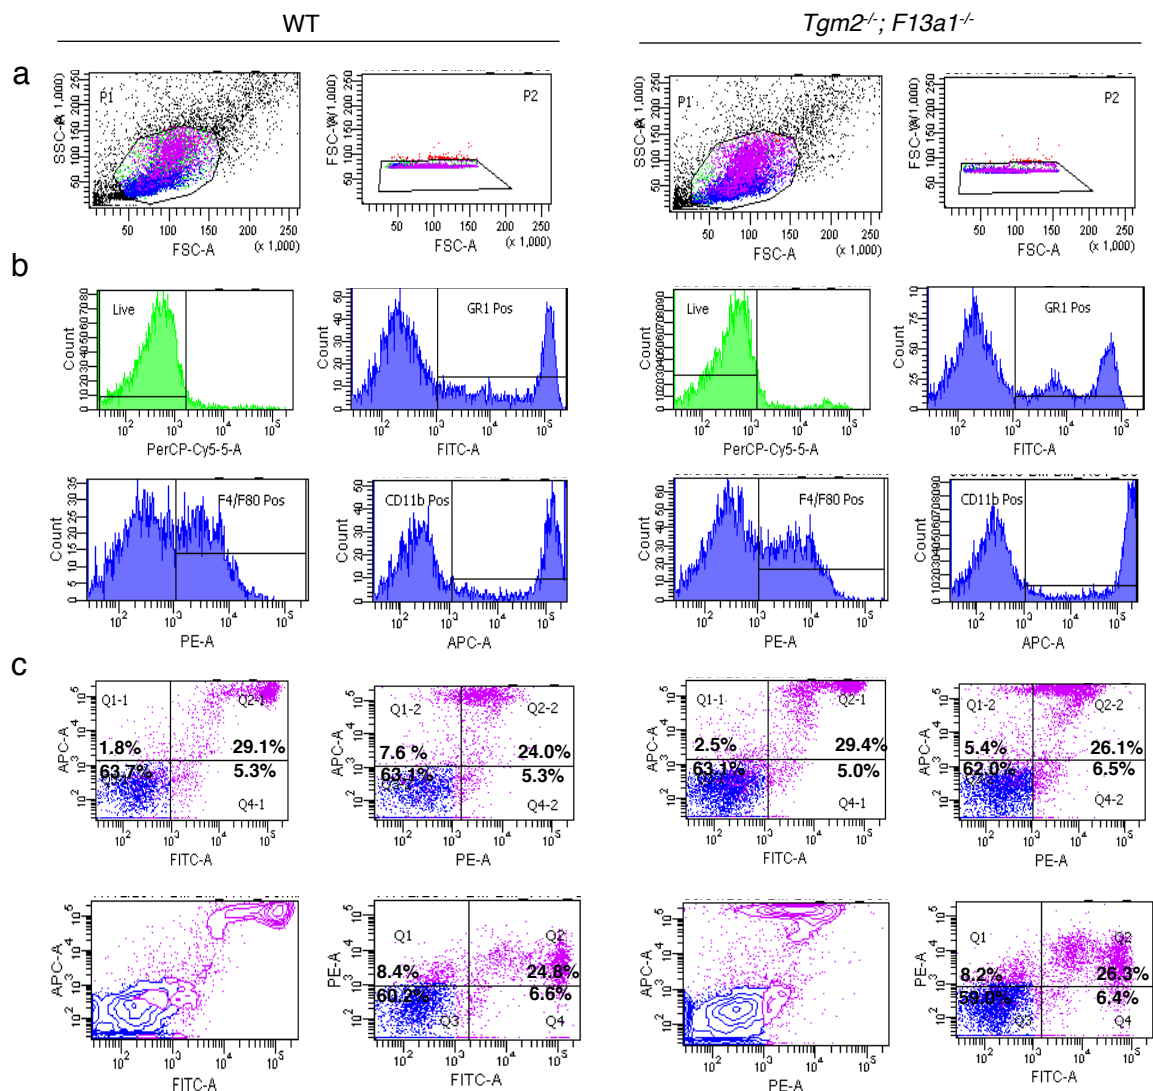

**Supplementary Figure S3. No alterations in bone marrow myeloid lineage cell levels in 3 month old *Tgm2<sup>-/-</sup>; F13a1<sup>-/-</sup>* mice.** (a) Representative flow cytometry plots using FACSDIVA software. Dead cells were excluded by selecting all live cells from the Side-scatter (SSC) / Forward-scatter (FSC) plot which showed no differences in cell populations in general. (b) Histograms depict cell counts of Gr-1 (FITC), CD11b (APC) and F4/80 (PE) positive cells showing no differences in monocytes, neutrophils or eosinophils and macrophage levels in the marrow. (c) Percentages of 3-color single tube of bone marrow cells suspension is indicated on each two color combination plot of *Tgm2<sup>-/-</sup>; F13a1<sup>-/-</sup>* cells and WT cells showing no significant differences. Compensation controls for each fluorophore were included in each experiment. Sample n=3 per genotype.

## Supplementary Figure S4

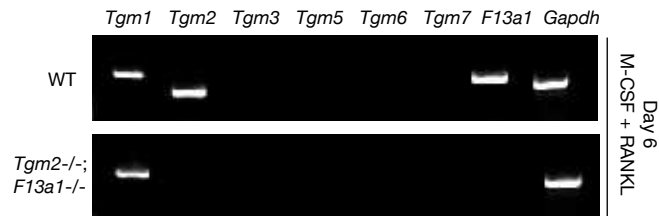

**Supplementary Figure S4. Expression of TG family members in WT and *Tgm2*<sup>-/-</sup>;*F13a1*<sup>-/-</sup> in osteoclasts isolated from 2 month old mice.** RT-PCR analyses of TG family members demonstrate the presence of *Tgm1*, *Tgm2*, and *F13a1* in mature osteoclasts.

## Supplementary Figure S5

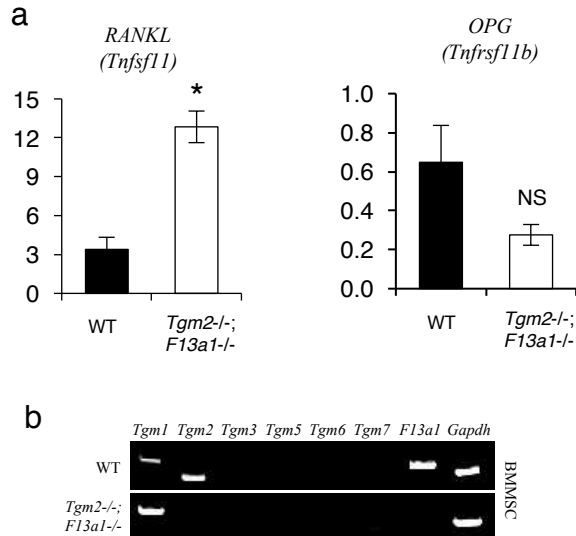

**Supplementary Figure S5. qRT-PCR and RT-PCR analyses of RANKL (*Tnfrsf11*), OPG (*Tnfrsf11b*) *Tgm* family members in bmMSCs isolated from 2 month old mice. (a) Quantification shows dramatic and significant increase in RANKL (*Tnfrsf11*), decrease (not significant) in OPG in *Tgm2*<sup>-/-</sup>;*F13a1*<sup>-/-</sup> cells. \**p*<0.05. NS; not significant. *n*=3. (b) Analysis of mRNA expression of TG family members show the presence of *Tgm2*, *F13a1* and *Tgm1* in bmMSCs in WT cells and upregulation of *Tgm1* in *Tgm2*<sup>-/-</sup>;*F13a1*<sup>-/-</sup> cells. RT-PCR image represents data from 2 separate cell culture experiments.**

## Supplementary Figure S6

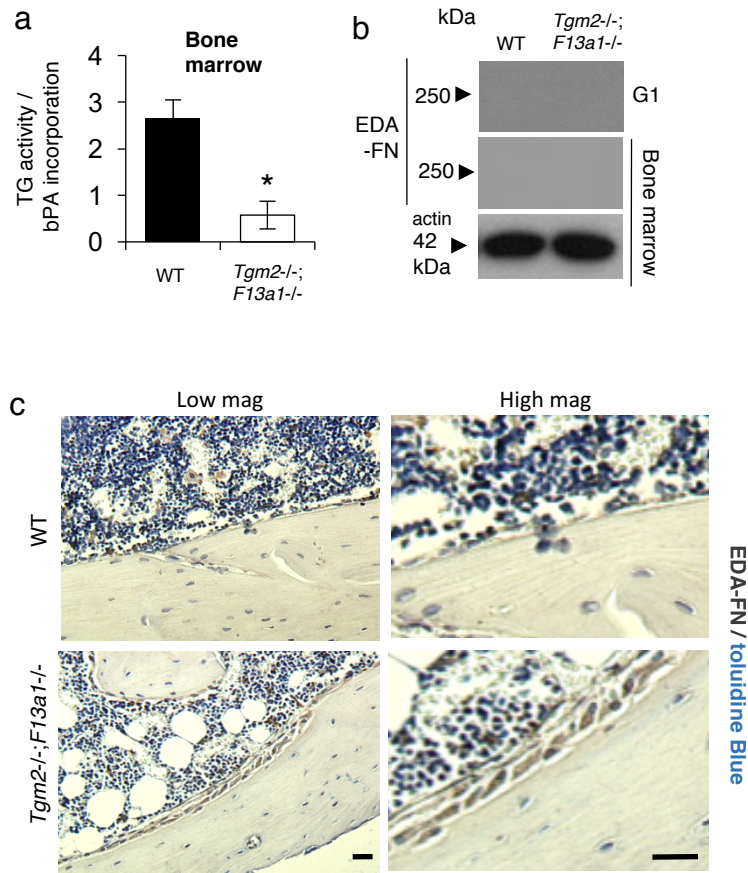

**Supplementary Figure S6. EDA-FN and TG-activity in the bone marrow of 3 month old mice *Tgm2*<sup>-/-</sup>;*F13a1*<sup>-/-</sup> mice.** (a) TG-activity assay, performed using biotinylated pentylamine as a probe, shows significant decrease in TG activity in bone marrow. NS; not significant. \* $p < 0.05$ ,  $n=3$ . (b) Western blot analysis of EDA-FN in the G1-extract of bone and in flushed bone marrow show no EDA-FN in either material. The actin blot is the same as in Figure 6c as analysis was done at the same time and from same samples. Western blot image is representative of 2 blots from 3 mice. (c) Staining of bone sections for EDA-FN (cellular FN) (brown)(counterstained with toluidine blue) shows EDA-FN production in osteoblasts. The presence of adipocytes in the marrow is evident. Scale bars: 200  $\mu\text{m}$ .

## Supplementary Figure S7

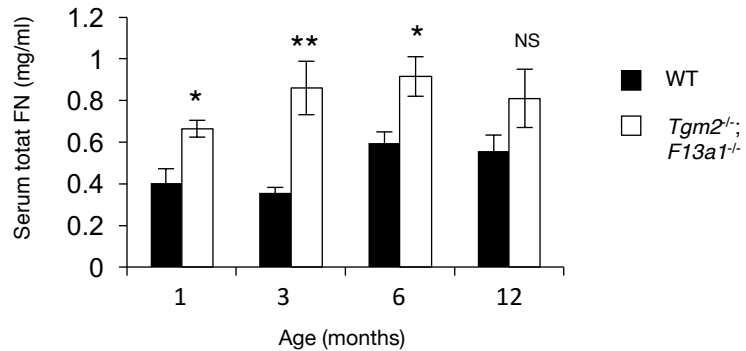

**Supplementary Figure S7. Circulating pFN levels in *Tgm2*<sup>-/-</sup>;*F13a1*<sup>-/-</sup> mice.** Plasma (pFN) levels are significantly increased in double-null mouse sera at 1, 3 and 6 months age. One year old mice showed no significant differences. NS; not significant. \* $p < 0.05$ , \*\* $p < 0.01$ ,  $n = 6-7$ .
