# Supplementary material
Source: PubMed Central journal article supplement (PMC5423109)
Supplement: cdd201721x2.pdf [file cdd201721x2.pdf]

**TABLE 1.**

**Bone mineral densities (BMD) of all backgrounds and genotypes at 3 months age.** Significance was assessed via one way ANOVA. Ctrl-Ctrl column compares controls to each other. Significant change indicated with \* ( $p < 0.05$ ). In parenthesis is genotype significance was observed to. NS; not significant. Last column (dKO – Ctrl) represents comparison of *Tgm2*<sup>-/-</sup>; *F13a1*<sup>-/-</sup> mice to all other genotypes. These mice show significance only to their C57BL/6;CBA control.

| Background / Genotype                                            | BMD (g/cm <sup>2</sup> ) | SEM      | Significance (ANOVA) |            |
|------------------------------------------------------------------|--------------------------|----------|----------------------|------------|
|                                                                  |                          |          | Ctrl-Ctrl            | dKO - Ctrl |
| C57BL/6 (n = 6)                                                  | 0.050767                 | 0.000880 | * (C57;CBA)          | NS         |
| <i>Tgm2</i> <sup>-/-</sup> (n = 6)                               | 0.053250                 | 0.001737 | NS                   | NS         |
| CBA/CA (n = 7)                                                   | 0.053943                 | 0.000545 | NS                   | NS         |
| <i>F13a1</i> <sup>-/-</sup> (n = 6)                              | 0.054150                 | 0.000852 | NS                   | NS         |
| C57BL/6;CBA/CA (n = 11)                                          | 0.055836                 | 0.000477 | * (C57)              | *          |
| <i>Tgm2</i> <sup>-/-</sup> ; <i>F13a1</i> <sup>-/-</sup> (n = 8) | 0.051100                 | 0.000608 |                      |            |

**TABLE 2.**

**Ultimate force required to fracture bone of all backgrounds and genotypes at 3 months age.** Force was measured via three-point bending test. Significance was assessed via one way ANOVA. Ctrl-Ctrl column compares controls to each other. Significant change indicated with \* ( $p < 0.05$ ). NS; not significant. In parenthesis is genotype significance was observed to. *Tgm2*<sup>-/-</sup>; *F13a1*<sup>-/-</sup> mice show significance to *Tgm2*<sup>-/-</sup> mice and to their C57BL/6;CBA control.

| Backgrounds / Genotypes                                          | Ultimate force (N) | SEM   | Significance (ANOVA) |            |
|------------------------------------------------------------------|--------------------|-------|----------------------|------------|
|                                                                  |                    |       | Ctrl-Ctrl            | dKO - Ctrl |
| C57BL/6 (n = 6)                                                  | 21.277             | 0.694 | NS                   | NS         |
| <i>Tgm2</i> <sup>-/-</sup> (n = 6)                               | 24.816             | 1.322 | NS                   | *          |
| CBA/CA (n = 6)                                                   | 22.112             | 0.390 | NS                   | NS         |
| <i>F13a1</i> <sup>-/-</sup> (n = 6)                              | 21.784             | 0.721 | NS                   | NS         |
| C57BL/6;CBA/CA (n = 5)                                           | 24.594             | 0.844 | NS                   | *          |
| <i>Tgm2</i> <sup>-/-</sup> ; <i>F13a1</i> <sup>-/-</sup> (n = 6) | 20.410             | 0.811 |                      |            |

TABLE 3.

**μComputed tomopgraphy (μCT) parameters; bone volume / tissue volume (BV/TV), trabecular number (Tb.N.) and trabecular spacing (Tb.Sp.) of all backgrounds and genotypes at 3 months age.** Force was measured via three-point bending test. Significance was assessed via one way ANOVA. Ctrl-Ctrl column compares controls to each other. Significant change indicated with \* (p<0.05). NS; not significant. In parenthesis is genotype significance was observed to. *Tgm2<sup>-/-</sup>;F13a1<sup>-/-</sup>* mice show significance only to their C57BL/6;CBA control.

| Background / Genotype                                 | μCT parameter |        | Significance (ANOVA) |            |
|-------------------------------------------------------|---------------|--------|----------------------|------------|
|                                                       | BV/TV (%)     | SEM    | Ctrl-Ctrl            | dKO - Ctrl |
| C57BL/6 (n = 3)                                       | 6.2454        | 1.0213 | NS                   | NS         |
| <i>Tgm2<sup>-/-</sup></i> (n = 5)                     | 5.6762        | 1.0096 | NS                   | NS         |
| CBA/CA (n = 4)                                        | 6.3630        | 0.3865 | NS                   | NS         |
| <i>F13a1<sup>-/-</sup></i> (n = 6)                    | 7.3524        | 0.7848 | NS                   | NS         |
| C57BL/6;CBA/CA (n = 5)                                | 10.5645       | 2.0313 | NS                   | *          |
| <i>Tgm2<sup>-/-</sup>;F13a1<sup>-/-</sup></i> (n = 5) | 4.5999        | 0.8767 |                      |            |

| Background / Genotype                                 | Tr. N. (1/mm) |        | Significance (ANOVA) |            |
|-------------------------------------------------------|---------------|--------|----------------------|------------|
|                                                       | Tr. N. (1/mm) | SEM    | Ctrl-Ctrl            | dKO - Ctrl |
| C57BL/6 (n = 3)                                       | 1.1750        | 0.2018 | NS                   | NS         |
| <i>Tgm2<sup>-/-</sup></i> (n = 5)                     | 1.0167        | 0.1559 | NS                   | NS         |
| CBA/CA (n = 4)                                        | 1.0145        | 0.0587 | NS                   | NS         |
| <i>F13a1<sup>-/-</sup></i> (n = 6)                    | 1.1847        | 0.0939 | NS                   | NS         |
| C57BL/6;CBA/CA (n = 5)                                | 1.6940        | 0.2830 | NS                   | *          |
| <i>Tgm2<sup>-/-</sup>;F13a1<sup>-/-</sup></i> (n = 5) | 0.7964        | 0.1244 |                      |            |

| Background / Genotype                                 | Tr. Sp. (mm) |        | Significance (ANOVA)                          |            |
|-------------------------------------------------------|--------------|--------|-----------------------------------------------|------------|
|                                                       | Tr. Sp. (mm) | SEM    | Ctrl-Ctrl                                     | dKO - Ctrl |
| C57BL/6 (n = 3)                                       | 0.2569       | 0.0429 | * (CBA)                                       | NS         |
| <i>Tgm2<sup>-/-</sup></i> (n = 5)                     | 0.2965       | 0.0167 | * (CBA)                                       | NS         |
| CBA/CA (n = 4)                                        | 0.4273       | 0.0519 | * ( <i>Tgm2<sup>-/-</sup></i> , C57, C57;CBA) | NS         |
| <i>F13a1<sup>-/-</sup></i> (n = 6)                    | 0.3697       | 0.0294 | * (C57;CBA)                                   | NS         |
| C57BL/6;CBA/CA (n = 5)                                | 0.2435       | 0.0096 | * (CBA, <i>F13a1<sup>-/-</sup></i> )          | *          |
| <i>Tgm2<sup>-/-</sup>;F13a1<sup>-/-</sup></i> (n = 5) | 0.3853       | 0.0176 |                                               |            |

**TABLE 4.**

**Serum levels of bone resorption marker (RatLaps™) of all backgrounds and genotypes at 3 months age.** Significance was assessed via one way ANOVA. Ctrl-Ctrl column compares controls to each other. Significant change indicated with \* (p<0.05). NS; not significant. In parenthesis is genotype significance was observed to. *Tgm2<sup>-/-</sup>;F13a1<sup>-/-</sup>* mice show significance to its C57BL/6;CBA control as well as *Tgm2<sup>-/-</sup>* and CBA/CA control.

| Background / Genotype                                 | RatLaps (ng/ml) | SEM   | Significance (ANOVA) |            |
|-------------------------------------------------------|-----------------|-------|----------------------|------------|
|                                                       |                 |       | Ctrl-Ctrl            | dKO - Ctrl |
| C57BL/6 (n = 3)                                       | 24.7300         | 1.510 | NS                   | NS         |
| <i>Tgm2<sup>-/-</sup></i> (n = 5)                     | 23.4580         | 1.686 | NS                   | *          |
| CBA/CA (n = 4)                                        | 19.7425         | 0.97  | NS                   | *          |
| <i>F13a1<sup>-/-</sup></i> (n = 6)                    | 27.0642         | 2.22  | NS                   | NS         |
| C57BL/6;CBA/CA (n = 6)                                | 19.8467         | 1.706 | NS                   | *          |
| <i>Tgm2<sup>-/-</sup>;F13a1<sup>-/-</sup></i> (n = 5) | 35.7540         | 4.990 |                      |            |
